# Supplementary material for: Urinary tissue inhibitor of metalloproteinase-2 and insulin-like growth factor-binding protein 7 as biomarkers of patients with established acute kidney injury
Source: PubMed Central journal article supplement — Korean J Intern Med. 2019 Dec 23;35(3):662–71. doi: 10.3904/kjim.2018.266 (PMC7214351; doi:10.3904/kjim.2018.266), 2019-12-23
Supplement: kjim-2018-266-suppl.pdf [file kjim-2018-266-suppl.pdf]

**Supplementary Table 1. Univariate analyses for predicting renal outcomes in patients without proteinuria ( $\geq 300$  mg/dL) or bilirubinuria**

| Variable                                       | RRT    |                | Non-recovery |                | CKD progression |                |
|------------------------------------------------|--------|----------------|--------------|----------------|-----------------|----------------|
|                                                | OR     | <i>p</i> value | OR           | <i>p</i> value | OR              | <i>p</i> value |
| Urine TIMP-2/IGFBP7 (vs. 1st and 2nd quartile) |        |                |              |                |                 |                |
| 3rd Quartile group                             | 4.248  | 0.109          | 2.526        | 0.088          | 1.732           | 0.561          |
| 4th Quartile group                             | 12.080 | 0.004          | 3.200        | 0.037          | 1.209           | 0.049          |

RRT, renal replacement therapy; CKD, chronic kidney disease; OR, odds ratio; TIMP-2, tissue inhibitor of metalloproteinase-2; IGFBP7, insulin-like growth factor-binding protein 7.
